# Supplementary material for: Theoretical insights into the gaseous and heterogeneous reactions of halogenated phenols with ˙OH radicals: mechanism, kinetics and role of (TiO2)nclusters in degradation processes
Source: Royal Society of Chemistry journal article supplement (doi:10.1039/d2cp02837a), 2022-01-01
Supplement: d2cp02837a1.pdf [file d2cp02837a1.pdf]

## Supporting Information for:

### **Theoretical insights into the gaseous and heterogeneous reactions of halogenated phenols with ·OH radical: Mechanism, kinetics, and role of (TiO<sub>2</sub>)<sub>n</sub> clusters in degradation processes**

Feng-Yang Bai<sup>a</sup>, Yu-Zhuo Yang<sup>a</sup>, Xiang-Huan Liu<sup>a</sup>, Mei-Yan Chen<sup>a</sup>, Shuang Ni<sup>a</sup>, Xiu-Mei Pan<sup>b</sup>, Zhen Zhao<sup>a,c\*</sup>, and Guo-De Li<sup>a,d\*</sup>

<sup>a</sup>*Institute of Catalysis for Energy and Environment, College of Chemistry and Chemical Engineering, Shenyang Normal University, Shenyang, 110034, People's Republic of China*

<sup>b</sup>*Institute of Functional Material Chemistry, Faculty of Chemistry, Northeast Normal University, Changchun, 130024, People's Republic of China*

<sup>c</sup>*State Key Laboratory of Heavy Oil Processing, China University of Petroleum, Chang Ping, Beijing 102249, People's Republic of China*

<sup>d</sup>*Office of academic research, Shenyang Normal University, Shenyang, 110034, People's Republic of China*

---

\*Corresponding author: [zhenzhao@cup.edu.cn](mailto:zhenzhao@cup.edu.cn) (Zhen Zhao)

\*Corresponding author: [1052434792@qq.com](mailto:1052434792@qq.com) (Guo-De Li)

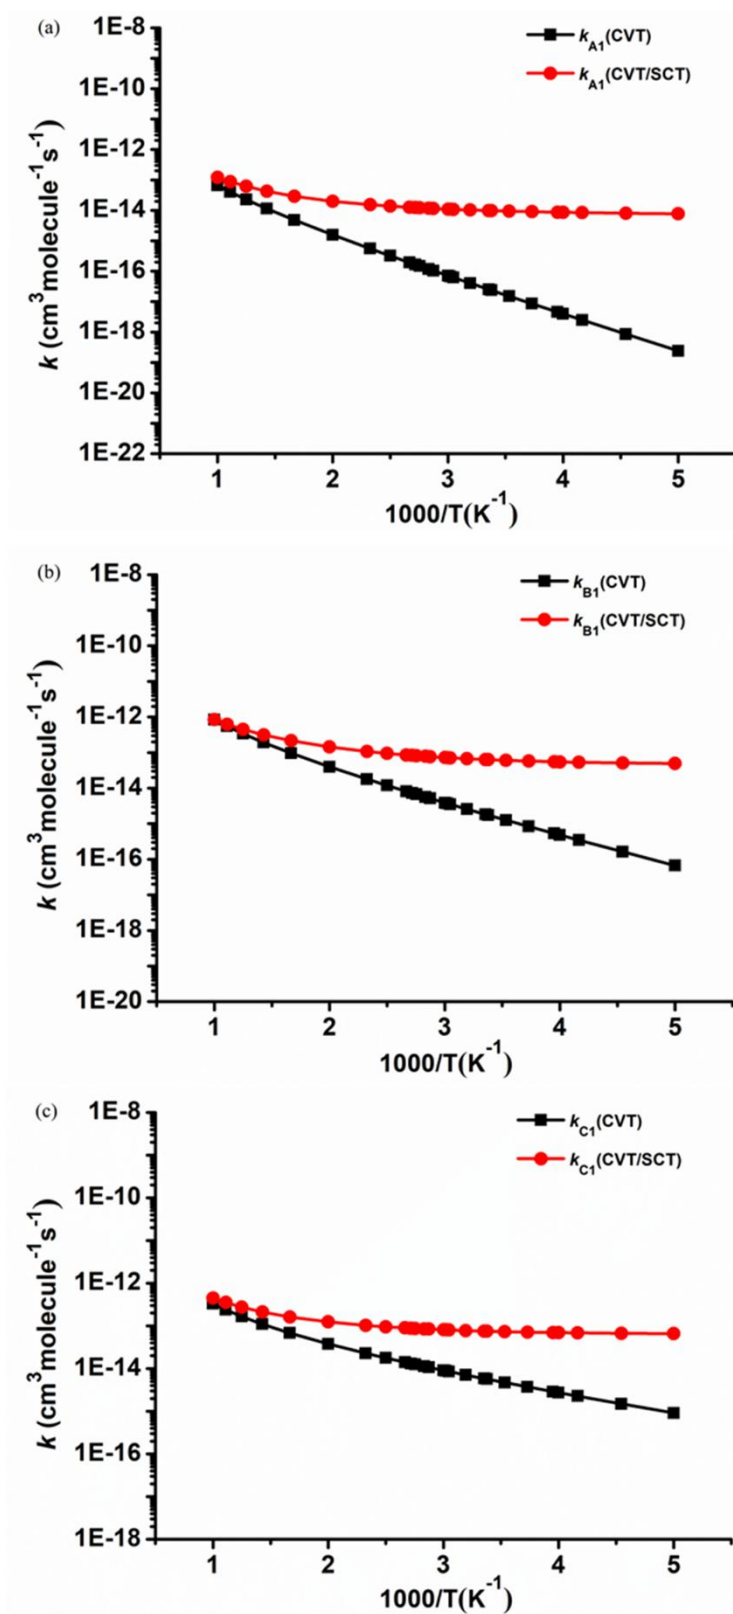

**Figure S1.** The CVT and CVT/SCT values for the individual reactions of  $C_6X_5OH$  ( $X=F, Cl,$  and  $Br$ ) with  $\cdot OH$  radical at the CCSD(T)/aug-cc-pVDZ//M06-2X/6-311G(d,p) level.

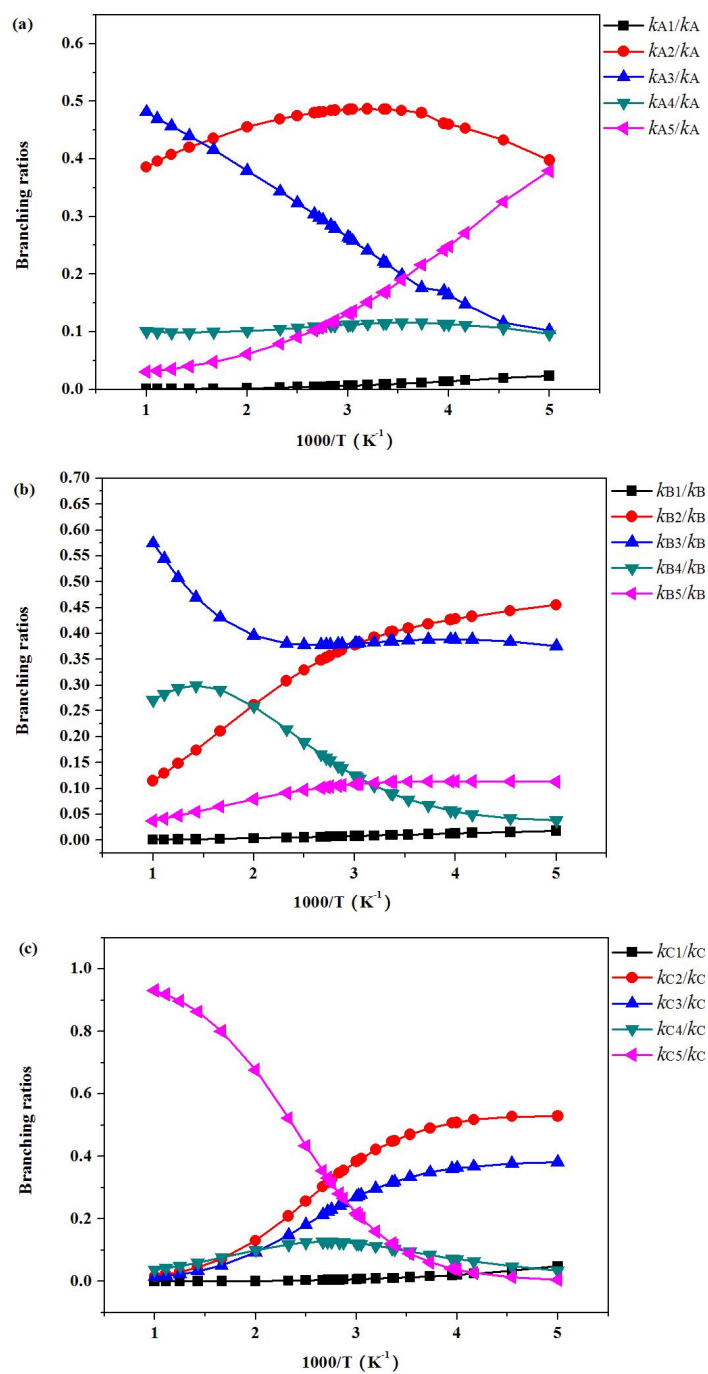

**Figure S2.** The branching ratios of rate coefficients versus  $1000/T$  for the individual reactions of  $C_6X_5OH$  ( $X=F, Cl, \text{ and } Br$ ) with  $\cdot OH$  radical at the CCSD(T)/aug-cc-pVDZ//M06-2X/6-311G(d,p) level.

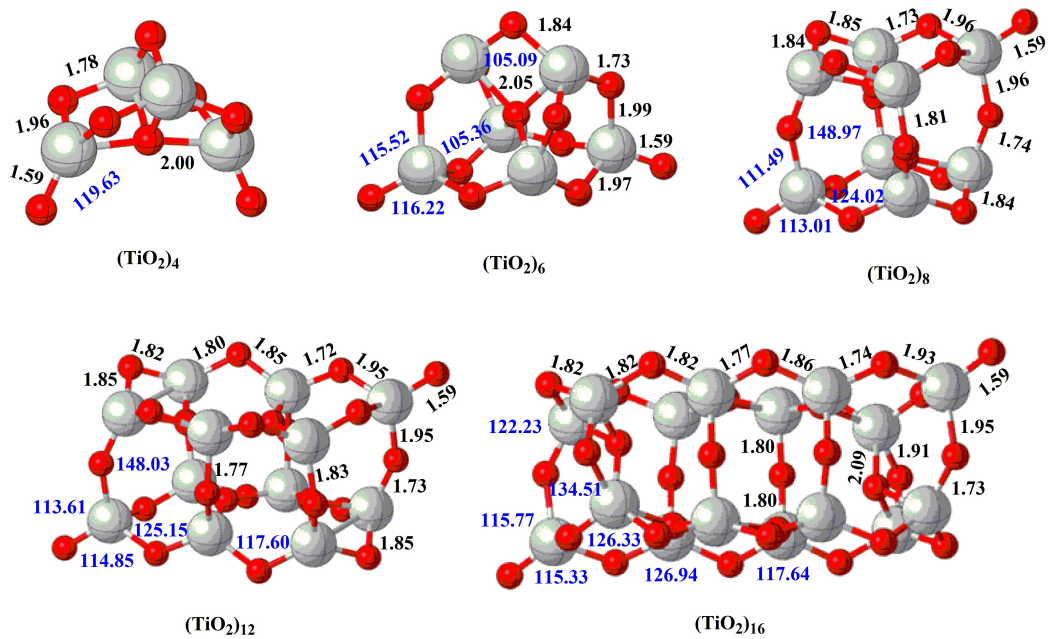

**Figure S3.** The structures parameters of (TiO<sub>2</sub>)<sub>n</sub> ( $n=4, 6, 8, 12,$  and  $16$ ) obtained at the M06-2X/6-311G(d,p)/LANL2DZ level.

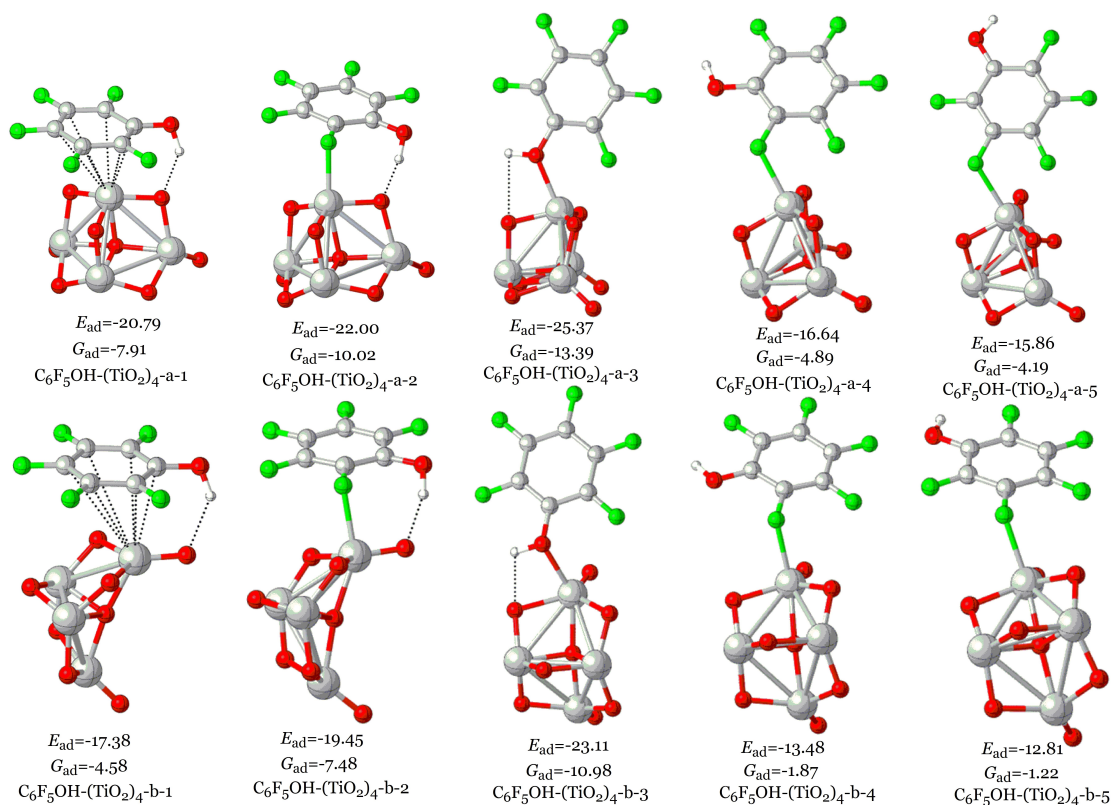

**Figure S4.** Feasible adsorption configurations of  $C_6F_5OH$  onto two different central Ti (a and b) of  $(TiO_2)_4$  cluster surface along with corresponding adsorption energies ( $E_{ad}$ ) and adsorption free energies ( $\Delta G$ ) (in kcal/mol).

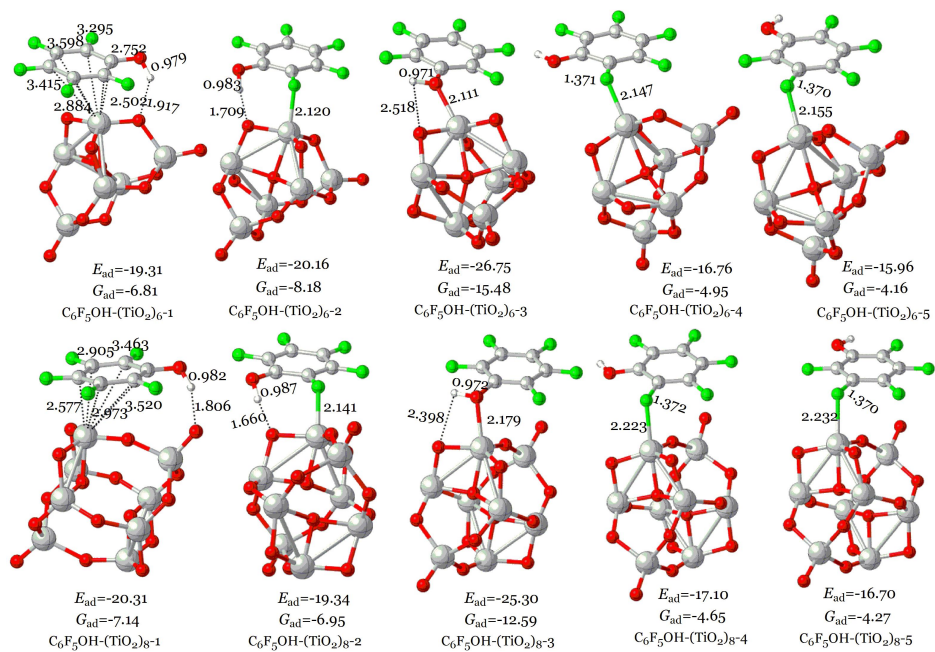

**Figure S5.** Feasible adsorption configurations of  $C_6F_5OH$  onto the surface of  $(TiO_2)_6$  and  $(TiO_2)_8$  clusters along with corresponding adsorption energies ( $E_{ad}$ ) and adsorption free energies ( $\Delta G$ ) (in kcal/mol).

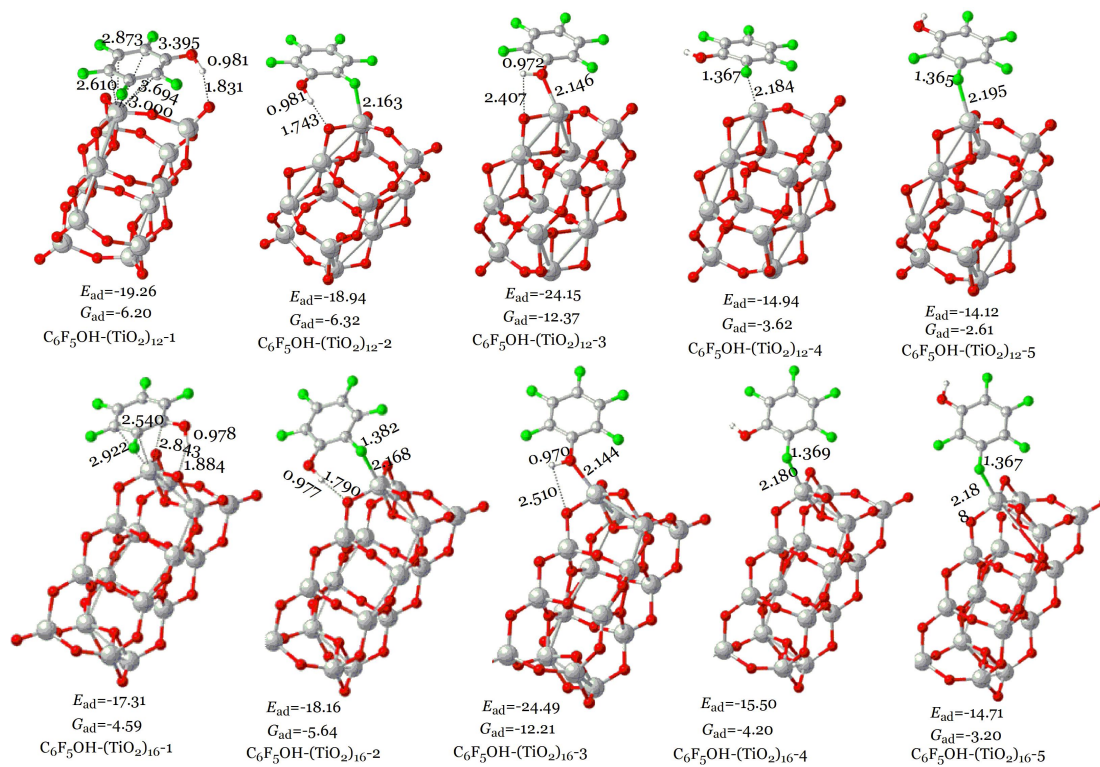

**Figure S6.** Feasible adsorption configurations of  $C_6F_5OH$  onto the surface of  $(TiO_2)_{12}$  and  $(TiO_2)_{16}$  clusters along with corresponding adsorption energies ( $E_{ad}$ ) and adsorption free energies ( $\Delta G$ ) (in kcal/mol).

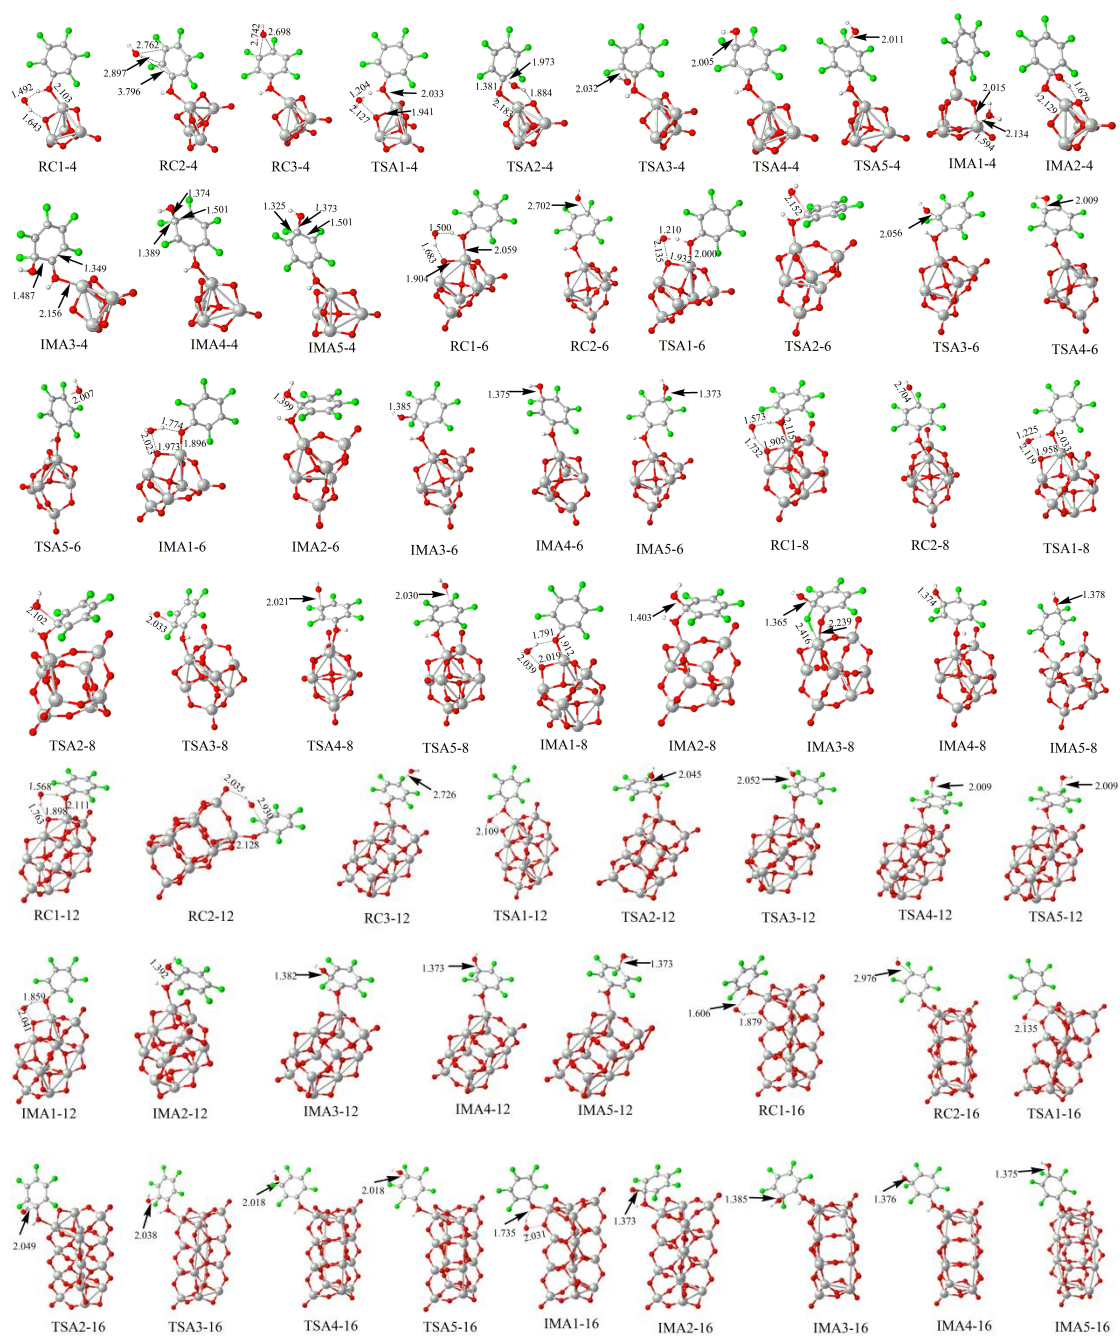

**Figure S7.** Optimized geometries of transition states and adsorption intermediates involved in the reactions of  $\cdot\text{OH}$  radical with  $\text{C}_6\text{F}_5\text{OH}$  onto the surface of  $(\text{TiO}_2)_n$  ( $n=4, 6, 8, 12, \text{ and } 16$ ) clusters .



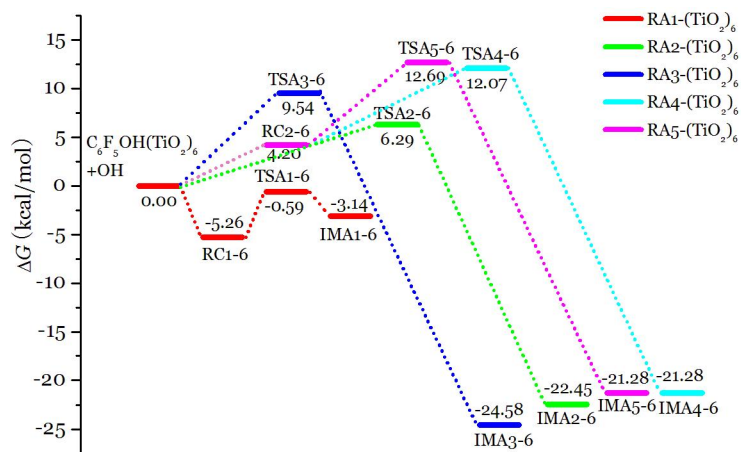

**Figure S8.** Schematic free energy surface for  $\cdot\text{OH}$ -initiated of  $\text{C}_6\text{F}_5\text{OH}$  catalyzed by  $(\text{TiO}_2)_6$  cluster at the M06-2X/6-311++G(3df,3pd)-LANL2DZ//M06-2X/6-311G(d,p)-LANL2DZ level.

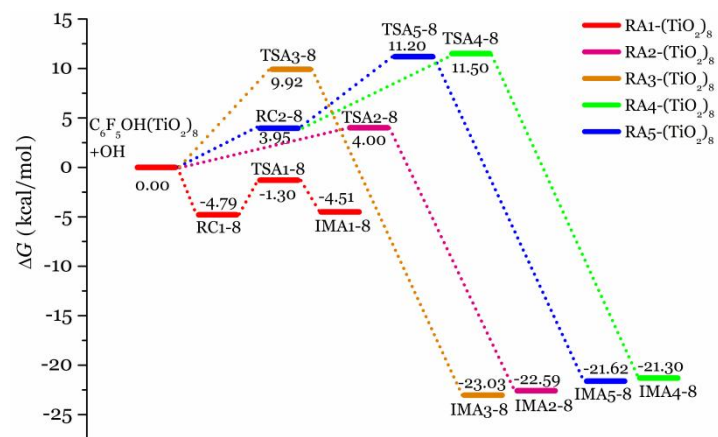

**Figure S9.** Schematic free energy surface for ·OH-initiated of C<sub>6</sub>F<sub>5</sub>OH catalyzed by (TiO<sub>2</sub>)<sub>8</sub> cluster at the M06-2X/6-311++G(3df,3pd)-LANL2DZ//M06-2X/6-311G(d,p)-LANL2DZ level.

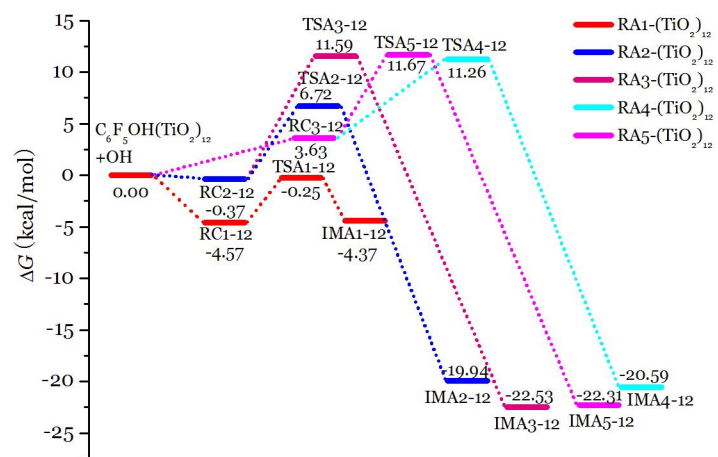

**Figure S10.** Schematic free energy surface for ·OH-initiated of C<sub>6</sub>F<sub>5</sub>OH catalyzed by (TiO<sub>2</sub>)<sub>12</sub> cluster at the M06-2X/6-311++G(3df,3pd)-LANL2DZ//M06-2X/6-311G(d,p)-LANL2DZ level.

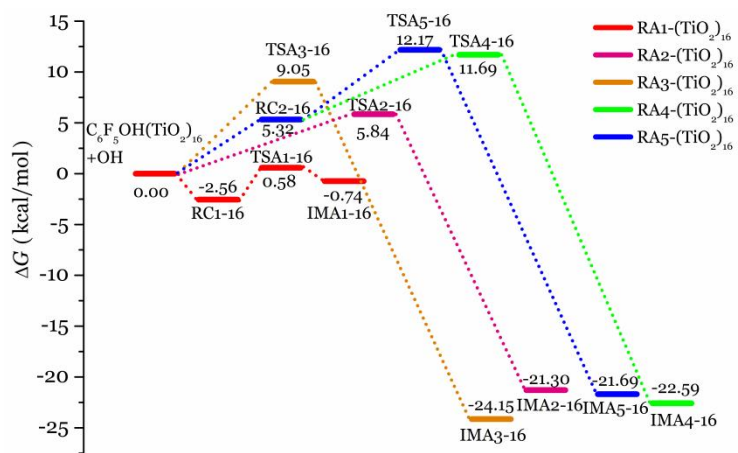

**Figure S11.** Schematic free energy surface for  $\cdot\text{OH}$ -initiated of  $\text{C}_6\text{F}_5\text{OH}$  onto  $(\text{TiO}_2)_{16}$  clusters at the M06-2X/6-311++G(3df,3pd)-LANL2DZ//M06-2X/6-31G(d)-LANL2DZ level.

**Table S1.** Calculated individual and total CVT/SCT rate constants versus 1000/T along with the experimental values for reactions of C<sub>6</sub>F<sub>5</sub>OH with ·OH radical.

| <i>T</i> (K) | $k_{A1}$ | $k_{A2}$ | $k_{A3}$ | $k_{A4}$ | $k_{A5}$ | $k_A$    | <i>Expt.</i>    |
|--------------|----------|----------|----------|----------|----------|----------|-----------------|
| 200          | 4.45E-14 | 7.51E-13 | 1.94E-13 | 1.82E-13 | 7.16E-13 | 1.89E-12 |                 |
| 220          | 4.6E-14  | 1.01E-12 | 2.7E-13  | 2.49E-13 | 7.6E-13  | 2.33E-12 |                 |
| 240          | 4.79E-14 | 1.36E-12 | 4.44E-13 | 3.36E-13 | 8.14E-13 | 3.00E-12 |                 |
| 250          | 4.89E-14 | 1.57E-12 | 5.59E-13 | 3.87E-13 | 8.47E-13 | 3.41E-12 |                 |
| 253          | 4.92E-14 | 1.64E-12 | 6.06E-13 | 4.03E-13 | 8.58E-13 | 3.56E-12 |                 |
| 268          | 5.09E-14 | 2.03E-12 | 7.46E-13 | 4.92E-13 | 9.14E-13 | 4.23E-12 |                 |
| 283          | 5.28E-14 | 2.48E-12 | 1.02E-12 | 5.95E-13 | 9.76E-13 | 5.12E-12 |                 |
| 296          | 5.45E-14 | 2.93E-12 | 1.32E-12 | 6.96E-13 | 1.03E-12 | 6.03E-12 | (6.88±1.37)E-12 |
| 298          | 5.48E-14 | 3.0E-12  | 1.37E-12 | 7.12E-13 | 1.04E-12 | 6.18E-12 |                 |
| 313          | 5.69E-14 | 3.6E-12  | 1.78E-12 | 8.45E-13 | 1.12E-12 | 7.40E-12 |                 |
| 328          | 5.91E-14 | 4.28E-12 | 2.27E-12 | 9.94E-13 | 1.2E-12  | 8.80E-12 |                 |
| 331          | 5.96E-14 | 4.42E-12 | 2.38E-12 | 1.03E-12 | 1.21E-12 | 9.10E-12 |                 |
| 333          | 5.99E-14 | 4.52E-12 | 2.46E-12 | 1.05E-12 | 1.23E-12 | 9.32E-12 |                 |
| 348          | 6.23E-14 | 5.31E-12 | 3.06E-12 | 1.22E-12 | 1.31E-12 | 1.09E-11 |                 |
| 353          | 6.32E-14 | 5.59E-12 | 3.29E-12 | 1.28E-12 | 1.34E-12 | 1.16E-11 |                 |
| 363          | 6.49E-14 | 6.18E-12 | 3.77E-12 | 1.41E-12 | 1.41E-12 | 1.28E-11 |                 |
| 368          | 6.58E-14 | 6.49E-12 | 4.02E-12 | 1.48E-12 | 1.44E-12 | 1.35E-11 |                 |
| 375          | 6.71E-14 | 6.94E-12 | 4.4E-12  | 1.58E-12 | 1.48E-12 | 1.45E-11 |                 |
| 400          | 7.18E-14 | 8.71E-12 | 5.94E-12 | 1.96E-12 | 1.66E-12 | 1.83E-11 |                 |
| 430          | 7.8E-14  | 1.12E-11 | 8.2E-12  | 2.51E-12 | 1.89E-12 | 2.39E-11 |                 |
| 500          | 9.45E-14 | 1.86E-11 | 1.55E-11 | 4.14E-12 | 2.51E-12 | 4.08E-11 |                 |
| 600          | 1.23E-13 | 3.3E-11  | 3.15E-11 | 7.54E-12 | 3.63E-12 | 7.58E-11 |                 |
| 700          | 1.59E-13 | 5.27E-11 | 5.51E-11 | 1.24E-11 | 5.05E-12 | 1.25E-10 |                 |
| 800          | 2.04E-13 | 7.78E-11 | 8.72E-11 | 1.89E-11 | 6.79E-12 | 1.91E-10 |                 |
| 900          | 2.59E-13 | 1.08E-10 | 1.28E-10 | 2.74E-11 | 8.88E-12 | 2.73E-10 |                 |
| 1000         | 3.25E-13 | 1.44E-10 | 1.8E-10  | 3.78E-11 | 1.14E-11 | 3.74E-10 |                 |

**Table S2.** Calculated individual and total CVT/SCT rate constants versus  $1000/T$  for reactions of  $C_6Cl_5OH$  with  $\cdot OH$  radical.

| $T$ (K) | $k_{B1}$ | $k_{B2}$ | $k_{B3}$ | $k_{B4}$ | $k_{B5}$ | $k_B$    |
|---------|----------|----------|----------|----------|----------|----------|
| 200     | 4.95E-14 | 1.25E-12 | 1.03E-12 | 1.06E-13 | 3.1E-13  | 2.75E-12 |
| 220     | 5.1E-14  | 1.42E-12 | 1.23E-12 | 1.37E-13 | 3.64E-13 | 3.20E-12 |
| 240     | 5.33E-14 | 1.64E-12 | 1.47E-12 | 1.91E-13 | 4.32E-13 | 3.79E-12 |
| 250     | 5.47E-14 | 1.77E-12 | 1.6E-12  | 2.3E-13  | 4.72E-13 | 4.13E-12 |
| 253     | 5.52E-14 | 1.81E-12 | 1.65E-12 | 2.44E-13 | 4.84E-13 | 4.24E-12 |
| 268     | 5.77E-14 | 2.03E-12 | 1.88E-12 | 3.26E-13 | 5.53E-13 | 4.85E-12 |
| 283     | 6.05E-14 | 2.28E-12 | 2.15E-12 | 4.37E-13 | 6.3E-13  | 5.56E-12 |
| 296     | 6.32E-14 | 2.53E-12 | 2.41E-12 | 5.62E-13 | 7.05E-13 | 6.27E-12 |
| 298     | 6.37E-14 | 2.57E-12 | 2.46E-12 | 5.84E-13 | 7.17E-13 | 6.39E-12 |
| 313     | 6.72E-14 | 2.88E-12 | 2.81E-12 | 7.74E-13 | 8.13E-13 | 7.34E-12 |
| 328     | 7.11E-14 | 3.23E-12 | 3.22E-12 | 1.01E-12 | 9.19E-13 | 8.45E-12 |
| 331     | 7.19E-14 | 3.3E-12  | 3.31E-12 | 1.07E-12 | 9.42E-13 | 8.69E-12 |
| 333     | 7.25E-14 | 3.35E-12 | 3.37E-12 | 1.11E-12 | 9.57E-13 | 8.86E-12 |
| 348     | 7.68E-14 | 3.74E-12 | 3.86E-12 | 1.42E-12 | 1.08E-12 | 1.02E-11 |
| 353     | 7.84E-14 | 3.88E-12 | 4.04E-12 | 1.54E-12 | 1.12E-12 | 1.07E-11 |
| 363     | 8.16E-14 | 4.17E-12 | 4.42E-12 | 1.81E-12 | 1.21E-12 | 1.17E-11 |
| 368     | 8.32E-14 | 4.32E-12 | 4.63E-12 | 1.95E-12 | 1.26E-12 | 1.22E-11 |
| 375     | 8.56E-14 | 4.54E-12 | 4.93E-12 | 2.17E-12 | 1.32E-12 | 1.30E-11 |
| 400     | 9.48E-14 | 5.4E-12  | 6.19E-12 | 3.11E-12 | 1.59E-12 | 1.64E-11 |
| 430     | 1.07E-13 | 6.57E-12 | 8.13E-12 | 4.58E-12 | 1.95E-12 | 2.13E-11 |
| 500     | 1.44E-13 | 1.0E-11  | 1.51E-11 | 9.89E-12 | 3.02E-12 | 3.82E-11 |
| 600     | 2.15E-13 | 1.69E-11 | 3.45E-11 | 2.33E-11 | 5.21E-12 | 8.01E-11 |
| 700     | 3.14E-13 | 2.65E-11 | 7.13E-11 | 4.54E-11 | 8.3E-12  | 1.52E-10 |
| 800     | 4.48E-13 | 3.92E-11 | 1.34E-10 | 7.76E-11 | 1.25E-11 | 2.64E-10 |
| 900     | 6.21E-13 | 5.53E-11 | 2.33E-10 | 1.21E-10 | 1.79E-11 | 4.28E-10 |
| 1000    | 8.42E-13 | 7.5E-11  | 3.75E-10 | 1.77E-10 | 2.47E-11 | 6.53E-10 |

**Table S3.** Calculated individual and total CVT/SCT rate constants versus  $1000/T$  for reactions of  $C_6Br_5OH$  with  $\cdot OH$  radical within 200-1000 K.

| $T$ (K) | $k_{C1}$ | $k_{C2}$ | $k_{C3}$ | $k_{C4}$ | $k_{C5}$ | $k_C$    |
|---------|----------|----------|----------|----------|----------|----------|
| 200     | 6.6E-14  | 7.24E-13 | 5.22E-13 | 4.78E-14 | 8.29E-15 | 1.37E-12 |
| 220     | 6.68E-14 | 1.06E-12 | 7.57E-13 | 9.68E-14 | 2.72E-14 | 2.01E-12 |
| 240     | 6.83E-14 | 1.48E-12 | 1.05E-12 | 1.8E-13  | 7.78E-14 | 2.86E-12 |
| 250     | 6.92E-14 | 1.72E-12 | 1.23E-12 | 2.4E-13  | 1.25E-13 | 3.38E-12 |
| 253     | 6.95E-14 | 1.8E-12  | 1.28E-12 | 2.6E-13  | 1.44E-13 | 3.55E-12 |
| 268     | 7.12E-14 | 2.22E-12 | 1.58E-12 | 3.83E-13 | 2.76E-13 | 4.53E-12 |
| 283     | 7.32E-14 | 2.69E-12 | 1.91E-12 | 5.46E-13 | 5.02E-13 | 5.72E-12 |
| 296     | 7.5E-14  | 3.15E-12 | 2.23E-12 | 7.25E-13 | 8.09E-13 | 6.99E-12 |
| 298     | 7.53E-14 | 3.22E-12 | 2.28E-12 | 7.56E-13 | 8.68E-13 | 7.20E-12 |
| 313     | 7.77E-14 | 3.81E-12 | 2.69E-12 | 1.02E-12 | 1.44E-12 | 9.04E-12 |
| 328     | 8.03E-14 | 4.45E-12 | 3.14E-12 | 1.35E-12 | 2.29E-12 | 1.13E-11 |
| 331     | 8.08E-14 | 4.58E-12 | 3.24E-12 | 1.43E-12 | 2.5E-12  | 1.18E-11 |
| 333     | 8.12E-14 | 4.68E-12 | 3.3E-12  | 1.48E-12 | 2.65E-12 | 1.22E-11 |
| 348     | 8.4E-14  | 5.4E-12  | 3.81E-12 | 1.9E-12  | 4.04E-12 | 1.52E-11 |
| 353     | 8.5E-14  | 5.71E-12 | 3.99E-12 | 2.06E-12 | 4.62E-12 | 1.65E-11 |
| 363     | 8.7E-14  | 6.18E-12 | 4.36E-12 | 2.41E-12 | 5.98E-12 | 1.90E-11 |
| 368     | 8.81E-14 | 6.45E-12 | 4.55E-12 | 2.6E-12  | 6.77E-12 | 2.05E-11 |
| 375     | 8.96E-14 | 6.85E-12 | 4.82E-12 | 2.88E-12 | 8.03E-12 | 2.27E-11 |
| 400     | 9.53E-14 | 8.36E-12 | 5.89E-12 | 4.07E-12 | 1.41E-11 | 3.25E-11 |
| 430     | 1.03E-13 | 1.04E-11 | 7.33E-12 | 5.92E-12 | 2.59E-11 | 4.97E-11 |
| 500     | 1.24E-13 | 1.61E-11 | 1.14E-11 | 1.24E-11 | 8.36E-11 | 1.24E-10 |
| 600     | 1.62E-13 | 2.67E-11 | 1.93E-11 | 2.83E-11 | 2.99E-10 | 3.73E-10 |
| 700     | 2.12E-13 | 4.03E-11 | 2.99E-11 | 5.45E-11 | 7.89E-10 | 9.14E-10 |
| 800     | 2.75E-13 | 5.68E-11 | 4.34E-11 | 9.36E-11 | 1.71E-9  | 1.90E-9  |
| 900     | 3.53E-13 | 7.63E-11 | 6.03E-11 | 1.48E-10 | 3.23E-9  | 3.51E-9  |
| 1000    | 4.49E-13 | 9.92E-11 | 8.09E-11 | 2.19E-10 | 5.52E-9  | 5.92E-9  |

**Table S4.** Branching ratios of  $k_{A1}/k_A \sim k_{A5}/k_A$  at 200-1000 K.

| $T$ (K) | $k_{A1}/k_A$ | $k_{A2}/k_A$ | $k_{A3}/k_A$ | $k_{A4}/k_A$ | $k_{A5}/k_A$ |
|---------|--------------|--------------|--------------|--------------|--------------|
| 200     | 2.36%        | 39.79%       | 10.28%       | 9.64%        | 37.93%       |
| 220     | 1.97%        | 43.26%       | 11.56%       | 10.66%       | 32.55%       |
| 240     | 1.60%        | 45.31%       | 14.79%       | 11.19%       | 27.12%       |
| 250     | 1.43%        | 46.02%       | 16.38%       | 11.34%       | 24.83%       |
| 253     | 1.38%        | 46.12%       | 17.04%       | 11.33%       | 24.13%       |
| 268     | 1.20%        | 47.96%       | 17.62%       | 11.62%       | 21.59%       |
| 283     | 1.03%        | 48.40%       | 19.91%       | 11.61%       | 19.05%       |
| 296     | 0.90%        | 48.59%       | 21.89%       | 11.54%       | 17.08%       |
| 298     | 0.89%        | 48.57%       | 22.18%       | 11.53%       | 16.84%       |
| 313     | 0.77%        | 48.64%       | 24.05%       | 11.42%       | 15.13%       |
| 328     | 0.67%        | 48.62%       | 25.79%       | 11.29%       | 13.63%       |
| 331     | 0.66%        | 48.57%       | 26.16%       | 11.32%       | 13.30%       |
| 333     | 0.64%        | 48.50%       | 26.40%       | 11.27%       | 13.20%       |
| 348     | 0.57%        | 48.44%       | 27.91%       | 11.13%       | 11.95%       |
| 353     | 0.55%        | 48.34%       | 28.45%       | 11.07%       | 11.59%       |
| 363     | 0.51%        | 48.15%       | 29.37%       | 10.99%       | 10.99%       |
| 368     | 0.49%        | 48.09%       | 29.79%       | 10.97%       | 10.67%       |
| 375     | 0.46%        | 47.97%       | 30.41%       | 10.92%       | 10.23%       |
| 400     | 0.39%        | 47.49%       | 32.39%       | 10.69%       | 9.05%        |
| 430     | 0.33%        | 46.91%       | 34.34%       | 10.51%       | 7.92%        |
| 500     | 0.23%        | 45.54%       | 37.95%       | 10.14%       | 6.15%        |
| 600     | 0.16%        | 43.54%       | 41.56%       | 9.95%        | 4.79%        |
| 700     | 0.13%        | 42.02%       | 43.94%       | 9.89%        | 4.03%        |
| 800     | 0.11%        | 40.76%       | 45.68%       | 9.90%        | 3.56%        |
| 900     | 0.10%        | 39.63%       | 46.97%       | 10.05%       | 3.26%        |
| 1000    | 0.09%        | 38.55%       | 48.19%       | 10.12%       | 3.05%        |



**Table S5.** Branching ratios of  $k_{B1}/k_B \sim k_{B5}/k_B$  at 200-1000 K.

| $T$ (K) | $k_{B1}/k_B$ | $k_{B2}/k_B$ | $k_{B3}/k_B$ | $k_{B4}/k_B$ | $k_{B5}/k_B$ |
|---------|--------------|--------------|--------------|--------------|--------------|
| 200     | 1.80%        | 45.53%       | 37.52%       | 3.86%        | 11.29%       |
| 220     | 1.59%        | 44.35%       | 38.41%       | 4.28%        | 11.37%       |
| 240     | 1.41%        | 43.31%       | 38.82%       | 5.05%        | 11.41%       |
| 250     | 1.33%        | 42.89%       | 38.77%       | 5.57%        | 11.44%       |
| 253     | 1.30%        | 42.66%       | 38.89%       | 5.75%        | 11.41%       |
| 268     | 1.19%        | 41.88%       | 38.79%       | 6.73%        | 11.41%       |
| 283     | 1.09%        | 41.03%       | 38.69%       | 7.86%        | 11.34%       |
| 296     | 1.01%        | 40.35%       | 38.44%       | 8.96%        | 11.24%       |
| 298     | 1.00%        | 40.19%       | 38.47%       | 9.13%        | 11.21%       |
| 313     | 0.92%        | 39.22%       | 38.26%       | 10.54%       | 11.07%       |
| 328     | 0.84%        | 38.22%       | 38.11%       | 11.95%       | 10.88%       |
| 331     | 0.83%        | 37.96%       | 38.07%       | 12.31%       | 10.84%       |
| 333     | 0.82%        | 37.81%       | 38.04%       | 12.53%       | 10.80%       |
| 348     | 0.76%        | 36.75%       | 37.93%       | 13.95%       | 10.61%       |
| 353     | 0.74%        | 36.40%       | 37.90%       | 14.45%       | 10.51%       |
| 363     | 0.70%        | 35.67%       | 37.81%       | 15.48%       | 10.35%       |
| 368     | 0.68%        | 35.29%       | 37.82%       | 15.93%       | 10.29%       |
| 375     | 0.66%        | 34.80%       | 37.79%       | 16.63%       | 10.12%       |
| 400     | 0.58%        | 32.96%       | 37.78%       | 18.98%       | 9.70%        |
| 430     | 0.50%        | 30.79%       | 38.10%       | 21.47%       | 9.14%        |
| 500     | 0.38%        | 26.21%       | 39.58%       | 25.92%       | 7.92%        |
| 600     | 0.27%        | 21.09%       | 43.06%       | 29.08%       | 6.50%        |
| 700     | 0.21%        | 17.46%       | 46.97%       | 29.91%       | 5.47%        |
| 800     | 0.17%        | 14.86%       | 50.81%       | 29.42%       | 4.74%        |
| 900     | 0.15%        | 12.93%       | 54.46%       | 28.28%       | 4.18%        |
| 1000    | 0.13%        | 11.49%       | 57.47%       | 27.13%       | 3.79%        |

**Table S6.** Branching ratios of  $k_{C1}/k_C \sim k_{C5}/k_C$  at 200-1000 K.

| $T$ (K) | $k_{C1}/k_{CT}$ | $k_{C2}/k_{CT}$ | $k_{C3}/k_{CT}$ | $k_{C4}/k_{CT}$ | $k_{C5}/k_{CT}$ |
|---------|-----------------|-----------------|-----------------|-----------------|-----------------|
| 200     | 4.82%           | 52.92%          | 38.16%          | 3.49%           | 0.61%           |
| 220     | 3.33%           | 52.79%          | 37.70%          | 4.82%           | 1.36%           |
| 240     | 2.39%           | 51.82%          | 36.76%          | 6.30%           | 2.72%           |
| 250     | 2.05%           | 50.82%          | 36.35%          | 7.09%           | 3.69%           |
| 253     | 1.96%           | 50.65%          | 36.02%          | 7.32%           | 4.05%           |
| 268     | 1.57%           | 49.00%          | 34.88%          | 8.45%           | 6.09%           |
| 283     | 1.28%           | 47.02%          | 33.39%          | 9.54%           | 8.77%           |
| 296     | 1.07%           | 45.07%          | 31.91%          | 10.37%          | 11.58%          |
| 298     | 1.05%           | 44.73%          | 31.67%          | 10.50%          | 12.06%          |
| 313     | 0.86%           | 42.16%          | 29.76%          | 11.29%          | 15.93%          |
| 328     | 0.71%           | 39.35%          | 27.76%          | 11.94%          | 20.25%          |
| 331     | 0.68%           | 38.71%          | 27.39%          | 12.09%          | 21.13%          |
| 333     | 0.67%           | 38.39%          | 27.07%          | 12.14%          | 21.74%          |
| 348     | 0.55%           | 35.45%          | 25.01%          | 12.47%          | 26.52%          |
| 353     | 0.52%           | 34.68%          | 24.23%          | 12.51%          | 28.06%          |
| 363     | 0.46%           | 32.50%          | 22.93%          | 12.67%          | 31.45%          |
| 368     | 0.43%           | 31.53%          | 22.24%          | 12.71%          | 33.09%          |
| 375     | 0.40%           | 30.22%          | 21.26%          | 12.70%          | 35.42%          |
| 400     | 0.29%           | 25.71%          | 18.12%          | 12.52%          | 43.36%          |
| 430     | 0.21%           | 20.95%          | 14.76%          | 11.92%          | 52.16%          |
| 500     | 0.10%           | 13.02%          | 9.22%           | 10.03%          | 67.62%          |
| 600     | 0.04%           | 7.15%           | 5.17%           | 7.58%           | 80.06%          |
| 700     | 0.02%           | 4.41%           | 3.27%           | 5.96%           | 86.33%          |
| 800     | 0.01%           | 2.98%           | 2.28%           | 4.92%           | 89.81%          |
| 900     | 0.01%           | 2.17%           | 1.72%           | 4.21%           | 91.89%          |
| 1000    | 0.01%           | 1.68%           | 1.37%           | 3.70%           | 93.25%          |

**Table S7.** Calculated atmospheric lifetime ( $\tau$ ) values for  $C_6F_5OH$  determined by  $\cdot OH$  at different temperature ( $T$ ) and altitude ( $H$ ) in the earth atmosphere according to the rate constants ( $k_A$ ).

| $T$ (K) | $k_A$    | $H$ (km) | $^a[\cdot OH]$ |           |           |            |           |           |           |           |           |  |
|---------|----------|----------|----------------|-----------|-----------|------------|-----------|-----------|-----------|-----------|-----------|--|
|         |          |          | $9.0E+05$      | $9.7E+05$ | $1.0E+06$ | $1.50E+06$ | $2.0E+06$ | $3.0E+06$ | $5.0E+06$ | $1.0E+07$ | $1.5E+07$ |  |
| 216.69  | 2.36E-12 | 12       | 130.78         | 121.34    | 117.70    | 78.47      | 58.85     | 39.23     | 23.54     | 11.77     | 7.85      |  |
| 223.29  | 2.58E-12 | 10       | 119.63         | 111.00    | 107.67    | 71.78      | 53.83     | 35.89     | 21.53     | 10.77     | 7.18      |  |
| 229.78  | 2.84E-12 | 9        | 108.68         | 100.83    | 97.81     | 65.21      | 48.90     | 32.60     | 19.56     | 9.78      | 6.52      |  |
| 236.27  | 3.13E-12 | 8        | 98.61          | 91.49     | 88.75     | 59.16      | 44.37     | 29.58     | 17.75     | 8.87      | 5.92      |  |
| 242.76  | 3.44E-12 | 7        | 89.72          | 83.25     | 80.75     | 53.83      | 40.37     | 26.92     | 16.15     | 8.07      | 5.38      |  |
| 249.25  | 3.80E-12 | 6        | 81.22          | 75.36     | 73.10     | 48.73      | 36.55     | 24.37     | 14.62     | 7.31      | 4.87      |  |
| 255.74  | 4.18E-12 | 5        | 73.84          | 68.51     | 66.45     | 44.30      | 33.23     | 22.15     | 13.29     | 6.65      | 4.43      |  |
| 262.23  | 3.92E-12 | 4        | 78.74          | 73.05     | 70.86     | 47.24      | 35.43     | 23.62     | 14.17     | 7.09      | 4.72      |  |
| 268.72  | 4.27E-12 | 3        | 72.28          | 67.07     | 65.05     | 43.37      | 32.53     | 21.68     | 13.01     | 6.51      | 4.34      |  |
| 275.21  | 4.65E-12 | 2        | 66.37          | 61.58     | 59.74     | 39.82      | 29.87     | 19.91     | 11.95     | 5.97      | 3.98      |  |
| 281.70  | 5.05E-12 | 1        | 61.12          | 56.71     | 55.01     | 36.67      | 27.50     | 18.34     | 11.00     | 5.50      | 3.67      |  |
| 288.19  | 5.47E-12 | 0        | 56.42          | 52.35     | 50.78     | 33.85      | 25.39     | 16.93     | 10.16     | 5.08      | 3.39      |  |
| 298.15  | 6.20E-12 | 0        | 49.78          | 46.19     | 44.80     | 29.87      | 22.40     | 14.93     | 8.96      | 4.48      | 2.99      |  |

<sup>a</sup>Herein, the  $[\cdot OH]$  is from references [66,67] (unit: molecule  $cm^{-3}$ ); <sup>b</sup> Unit:  $h$

**Table S8.** Calculated atmospheric lifetime ( $\tau$ ) values for  $C_6Cl_5OH$  determined by  $\cdot OH$  at different temperature ( $T$ ) and altitude ( $H$ ) in the earth atmosphere according to the rate constants ( $k_B$ ).

| $T$ (K) | $k_B$    | $H$ (km) | $^a[ \cdot OH ]$ |           |           |            |           |           |           |           |           |  |
|---------|----------|----------|------------------|-----------|-----------|------------|-----------|-----------|-----------|-----------|-----------|--|
|         |          |          | $9.0E+05$        | $9.7E+05$ | $1.0E+06$ | $1.50E+06$ | $2.0E+06$ | $3.0E+06$ | $5.0E+06$ | $1.0E+07$ | $1.5E+07$ |  |
| 216.69  | 3.12E-12 | 12       | 98.92            | 91.78     | 89.03     | 59.35      | 44.52     | 29.68     | 17.81     | 8.90      | 5.94      |  |
| 223.29  | 3.28E-12 | 10       | 94.10            | 87.31     | 84.69     | 56.46      | 42.34     | 28.23     | 16.94     | 8.47      | 5.65      |  |
| 229.78  | 3.47E-12 | 9        | 88.95            | 82.53     | 80.05     | 53.37      | 40.03     | 26.68     | 16.01     | 8.01      | 5.34      |  |
| 236.27  | 3.66E-12 | 8        | 84.33            | 78.24     | 75.90     | 50.60      | 37.95     | 25.30     | 15.18     | 7.59      | 5.06      |  |
| 242.76  | 3.87E-12 | 7        | 79.75            | 74.00     | 71.78     | 47.85      | 35.89     | 23.93     | 14.36     | 7.18      | 4.79      |  |
| 249.25  | 4.10E-12 | 6        | 75.28            | 69.85     | 67.75     | 45.17      | 33.88     | 22.58     | 13.55     | 6.78      | 4.52      |  |
| 255.74  | 4.35E-12 | 5        | 70.95            | 65.83     | 63.86     | 42.57      | 31.93     | 21.29     | 12.77     | 6.39      | 4.26      |  |
| 262.23  | 4.60E-12 | 4        | 67.10            | 62.25     | 60.39     | 40.26      | 30.19     | 20.13     | 12.08     | 6.04      | 4.03      |  |
| 268.72  | 4.87E-12 | 3        | 63.38            | 58.80     | 57.04     | 38.03      | 28.52     | 19.01     | 11.41     | 5.70      | 3.80      |  |
| 275.21  | 5.18E-12 | 2        | 59.58            | 55.28     | 53.63     | 35.75      | 26.81     | 17.88     | 10.73     | 5.36      | 3.58      |  |
| 281.70  | 5.49E-12 | 1        | 56.22            | 52.16     | 50.60     | 33.73      | 25.30     | 16.87     | 10.12     | 5.06      | 3.37      |  |
| 288.19  | 5.83E-12 | 0        | 52.94            | 49.12     | 47.65     | 31.76      | 23.82     | 15.88     | 9.53      | 4.76      | 3.18      |  |
| 298.15  | 6.40E-12 | 0        | 48.23            | 44.75     | 43.40     | 28.94      | 21.70     | 14.47     | 8.68      | 4.34      | 2.89      |  |

<sup>a</sup>Herein, the  $[ \cdot OH ]$  is from references [66,67] (unit: molecule  $cm^{-3}$ ); <sup>b</sup>Unit:  $h$

**Table S9.** Calculated atmospheric lifetime ( $\tau$ ) values for  $C_6Br_5OH$  determined by  $\cdot OH$  at different temperature ( $T$ ) and altitude ( $H$ ) in the earth atmosphere according to the rate constants ( $k_C$ ).

| $T$ (K) | $k_C$    | $H$ (km) | $^a[\cdot OH]$ |           |           |            |           |           |           |           |           |  |
|---------|----------|----------|----------------|-----------|-----------|------------|-----------|-----------|-----------|-----------|-----------|--|
|         |          |          | $9.0E+05$      | $9.7E+05$ | $1.0E+06$ | $1.50E+06$ | $2.0E+06$ | $3.0E+06$ | $5.0E+06$ | $1.0E+07$ | $1.5E+07$ |  |
| 216.69  | 1.89E-12 | 12       | 163.30         | 151.52    | 146.97    | 97.98      | 73.49     | 48.99     | 29.39     | 14.70     | 9.80      |  |
| 223.29  | 2.13E-12 | 10       | 144.90         | 134.45    | 130.41    | 86.94      | 65.21     | 43.47     | 26.08     | 13.04     | 8.69      |  |
| 229.78  | 2.39E-12 | 9        | 129.14         | 119.82    | 116.23    | 77.48      | 58.11     | 38.74     | 23.25     | 11.62     | 7.75      |  |
| 236.27  | 2.68E-12 | 8        | 115.16         | 106.85    | 103.65    | 69.10      | 51.82     | 34.55     | 20.73     | 10.36     | 6.91      |  |
| 242.76  | 2.99E-12 | 7        | 103.22         | 95.78     | 92.90     | 61.93      | 46.45     | 30.97     | 18.58     | 9.29      | 6.19      |  |
| 249.25  | 3.34E-12 | 6        | 92.41          | 85.74     | 83.17     | 55.44      | 41.58     | 27.72     | 16.63     | 8.32      | 5.54      |  |
| 255.74  | 3.71E-12 | 5        | 83.19          | 77.19     | 74.87     | 49.92      | 37.44     | 24.96     | 14.97     | 7.49      | 4.99      |  |
| 262.23  | 4.13E-12 | 4        | 74.73          | 69.34     | 67.26     | 44.84      | 33.63     | 22.42     | 13.45     | 6.73      | 4.48      |  |
| 268.72  | 4.58E-12 | 3        | 67.39          | 62.53     | 60.65     | 40.43      | 30.33     | 20.22     | 12.13     | 6.07      | 4.04      |  |
| 275.21  | 5.07E-12 | 2        | 60.88          | 56.48     | 54.79     | 36.53      | 27.39     | 18.26     | 10.96     | 5.48      | 3.65      |  |
| 281.70  | 5.61E-12 | 1        | 55.02          | 51.05     | 49.51     | 33.01      | 24.76     | 16.50     | 9.90      | 4.95      | 3.30      |  |
| 288.19  | 6.20E-12 | 0        | 49.78          | 46.19     | 44.80     | 29.87      | 22.40     | 14.93     | 8.96      | 4.48      | 2.99      |  |
| 298.15  | 7.21E-12 | 0        | 42.81          | 39.72     | 38.53     | 25.68      | 19.26     | 12.84     | 7.71      | 3.85      | 2.57      |  |

<sup>a</sup>Herein, the  $[\cdot OH]$  is from references [66,67] (unit: molecule  $cm^{-3}$ ); <sup>b</sup> Unit:  $h$

**Table S10.** The free energies barriers (in kcal/mol) for the degradation of C<sub>6</sub>F<sub>5</sub>OH in the absence and presence of (TiO<sub>2</sub>)<sub>n</sub> (*n* = 4, 6, 8, 12, and 16) clusters obtained at the M06-2X/6-311++G(3df,3pd)-LANL2DZ level based on the optimized geometries at the levels of M06-2X/6-311G(d,p)-LANL2DZ for *n*=4, 6, 8, 12 and M06-2X/6-31G(d)-LANL2DZ for *n*=16 .

| Reactions                                   | Naked | (TiO <sub>2</sub> ) <sub>4</sub> | (TiO <sub>2</sub> ) <sub>6</sub> | (TiO <sub>2</sub> ) <sub>8</sub> | (TiO <sub>2</sub> ) <sub>12</sub> | (TiO <sub>2</sub> ) <sub>16</sub> |
|---------------------------------------------|-------|----------------------------------|----------------------------------|----------------------------------|-----------------------------------|-----------------------------------|
| RA1 or RA1-(TiO <sub>2</sub> ) <sub>n</sub> | 8.78  | 4.95                             | 4.67                             | 3.50                             | 4.32                              | 3.14                              |
| RA2 or RA2-(TiO <sub>2</sub> ) <sub>n</sub> | 9.98  | 7.51                             | 6.29                             | 4.00                             | 6.73                              | 5.84                              |
| RA3 or RA3-(TiO <sub>2</sub> ) <sub>n</sub> | 9.50  | 10.35                            | 9.54                             | 9.92                             | 10.56                             | 9.05                              |
| RA4 or RA4-(TiO <sub>2</sub> ) <sub>n</sub> | 11.23 | 12.23                            | 12.07                            | 11.50                            | 11.59                             | 11.69                             |
| RA5 or RA5-(TiO <sub>2</sub> ) <sub>n</sub> | 10.22 | 11.59                            | 12.69                            | 11.20                            | 11.67                             | 12.17                             |

**Table S11.** Calculated individual and total rate constants for reactions of C<sub>6</sub>F<sub>5</sub>OH with ·OH radical within 200–430 K by TST method.

| $T$ (K) | $k_{A1}$ | $k_{A2}$ | $k_{A3}$ | $k_{A4}$ | $k_{A5}$ | $k_A$    |
|---------|----------|----------|----------|----------|----------|----------|
| 200     | 5.22E-20 | 1.68E-16 | 9.10E-17 | 8.45E-18 | 5.67E-17 | 3.24E-16 |
| 220     | 1.73E-19 | 2.35E-16 | 1.34E-16 | 1.52E-17 | 8.73E-17 | 4.72E-16 |
| 240     | 4.64E-19 | 3.15E-16 | 1.86E-16 | 2.52E-17 | 1.27E-16 | 6.54E-16 |
| 250     | 7.17E-19 | 3.58E-16 | 2.14E-16 | 3.15E-17 | 1.50E-16 | 7.54E-16 |
| 253     | 8.16E-19 | 3.73E-16 | 2.24E-16 | 3.37E-17 | 1.57E-16 | 7.89E-16 |
| 268     | 1.45E-18 | 4.46E-16 | 2.74E-16 | 4.55E-17 | 1.97E-16 | 9.64E-16 |
| 283     | 2.41E-18 | 5.25E-16 | 3.29E-16 | 6.00E-17 | 2.42E-16 | 1.16E-15 |
| 296     | 3.63E-18 | 5.98E-16 | 3.81E-16 | 7.44E-17 | 2.84E-16 | 1.34E-15 |
| 298     | 3.84E-18 | 6.09E-16 | 3.89E-16 | 7.66E-17 | 2.91E-16 | 1.37E-15 |
| 313     | 5.81E-18 | 7.03E-16 | 4.55E-16 | 9.65E-17 | 3.46E-16 | 1.61E-15 |
| 328     | 8.53E-18 | 7.95E-16 | 5.24E-16 | 1.19E-16 | 4.06E-16 | 1.85E-15 |
| 331     | 9.16E-18 | 8.19E-16 | 5.41E-16 | 1.24E-16 | 4.21E-16 | 1.91E-15 |
| 333     | 9.59E-18 | 8.30E-16 | 5.47E-16 | 1.27E-16 | 4.29E-16 | 1.94E-15 |
| 348     | 1.34E-17 | 9.32E-16 | 6.24E-16 | 1.54E-16 | 4.94E-16 | 2.22E-15 |
| 353     | 1.49E-17 | 9.69E-16 | 6.50E-16 | 1.64E-16 | 5.20E-16 | 2.32E-15 |
| 363     | 1.82E-17 | 1.04E-15 | 7.06E-16 | 1.84E-16 | 5.69E-16 | 2.52E-15 |
| 368     | 2.02E-17 | 1.08E-15 | 7.34E-16 | 1.94E-16 | 5.90E-16 | 2.62E-15 |
| 375     | 2.30E-17 | 1.13E-15 | 7.74E-16 | 2.09E-16 | 6.25E-16 | 2.76E-15 |
| 400     | 3.54E-17 | 1.33E-15 | 9.23E-16 | 2.71E-16 | 7.63E-16 | 3.32E-15 |
| 430     | 5.56E-17 | 1.57E-15 | 1.11E-15 | 3.55E-16 | 9.40E-16 | 4.03E-15 |

**Table S12.** Calculated individual and total rate constants for reactions of C<sub>6</sub>F<sub>5</sub>OH with ·OH radical catalyzed by (TiO<sub>2</sub>)<sub>4</sub> cluster within 200–430 K.

| $T$ (K) | $k_{A1-(TiO_2)_4}$ | $k_{A2-(TiO_2)_4}$ | $k_{A3-(TiO_2)_4}$ | $k_{A4-(TiO_2)_4}$ | $k_{A5-(TiO_2)_4}$ | $k_{A-(TiO_2)_4}$ |
|---------|--------------------|--------------------|--------------------|--------------------|--------------------|-------------------|
| 200     | 4.34E-04           | 7.14E-12           | 1.71E-15           | 1.03E-18           | 6.08E-18           | 4.34E-04          |
| 220     | 3.92E-05           | 4.20E-12           | 2.61E-15           | 2.14E-18           | 1.04E-17           | 3.92E-05          |
| 240     | 5.32E-06           | 2.74E-12           | 3.78E-15           | 3.99E-18           | 1.65E-17           | 5.32E-06          |
| 250     | 2.20E-06           | 2.29E-12           | 4.48E-15           | 5.27E-18           | 2.03E-17           | 2.20E-06          |
| 253     | 1.72E-06           | 2.17E-12           | 4.71E-15           | 5.71E-18           | 2.14E-17           | 1.72E-06          |
| 268     | 5.38E-07           | 1.72E-12           | 5.93E-15           | 8.27E-18           | 2.83E-17           | 5.38E-07          |
| 283     | 1.91E-07           | 1.40E-12           | 7.34E-15           | 1.16E-17           | 3.63E-17           | 1.91E-07          |
| 296     | 8.49E-08           | 1.20E-12           | 8.72E-15           | 1.51E-17           | 4.42E-17           | 8.49E-08          |
| 298     | 7.55E-08           | 1.17E-12           | 8.95E-15           | 1.57E-17           | 4.56E-17           | 7.55E-08          |
| 313     | 3.27E-08           | 1.01E-12           | 1.08E-14           | 2.07E-17           | 5.62E-17           | 3.27E-08          |
| 328     | 1.53E-08           | 8.78E-13           | 1.28E-14           | 2.68E-17           | 6.81E-17           | 1.53E-08          |
| 331     | 1.32E-08           | 8.56E-13           | 1.32E-14           | 2.82E-17           | 7.07E-17           | 1.32E-08          |
| 333     | 1.21E-08           | 8.42E-13           | 1.35E-14           | 2.92E-17           | 7.25E-17           | 1.21E-08          |
| 348     | 6.19E-09           | 7.52E-13           | 1.58E-14           | 3.65E-17           | 8.64E-17           | 6.19E-09          |
| 353     | 5.02E-09           | 7.26E-13           | 1.67E-14           | 3.93E-17           | 9.10E-17           | 5.02E-09          |
| 363     | 3.37E-09           | 6.79E-13           | 1.84E-14           | 4.54E-17           | 1.01E-16           | 3.37E-09          |
| 368     | 2.77E-09           | 6.59E-13           | 1.93E-14           | 4.86E-17           | 1.07E-16           | 2.77E-09          |
| 375     | 2.14E-09           | 6.32E-13           | 2.06E-14           | 5.32E-17           | 1.15E-16           | 2.14E-09          |
| 400     | 9.12E-10           | 5.55E-13           | 2.57E-14           | 7.22E-17           | 1.44E-16           | 9.13E-10          |
| 430     | 3.75E-10           | 4.90E-13           | 3.28E-14           | 1.00E-16           | 1.86E-16           | 3.76E-10          |



**Table S13.** Calculated individual and total rate constants for reactions of C<sub>6</sub>F<sub>5</sub>OH with ·OH radical catalyzed by (TiO<sub>2</sub>)<sub>6</sub> cluster within 200–430 K.

| $T$ (K) | $k_{A1-(TiO_2)_6}$ | $k_{A2-(TiO_2)_6}$ | $k_{A3-(TiO_2)_6}$ | $k_{A4-(TiO_2)_6}$ | $k_{A5-(TiO_2)_6}$ | $k_{A-(TiO_2)_6}$ |
|---------|--------------------|--------------------|--------------------|--------------------|--------------------|-------------------|
| 200     | 3.39E-04           | 6.89E-19           | 7.48E-15           | 1.31E-18           | 4.52E-19           | 3.39E-04          |
| 220     | 2.93E-05           | 1.88E-18           | 8.91E-15           | 2.75E-18           | 9.52E-19           | 2.93E-05          |
| 240     | 3.82E-06           | 4.40E-18           | 1.05E-14           | 5.18E-18           | 1.79E-18           | 3.82E-06          |
| 250     | 1.57E-06           | 6.44E-18           | 1.13E-14           | 6.84E-18           | 2.37E-18           | 1.57E-06          |
| 253     | 1.21E-06           | 7.18E-18           | 1.16E-14           | 7.41E-18           | 2.57E-18           | 1.21E-06          |
| 268     | 3.75E-07           | 1.20E-17           | 1.30E-14           | 1.08E-17           | 3.73E-18           | 3.75E-07          |
| 283     | 1.30E-07           | 1.91E-17           | 1.44E-14           | 1.52E-17           | 5.25E-18           | 1.30E-07          |
| 296     | 5.68E-08           | 2.76E-17           | 1.57E-14           | 1.99E-17           | 6.87E-18           | 5.68E-08          |
| 298     | 5.02E-08           | 2.91E-17           | 1.59E-14           | 2.06E-17           | 7.15E-18           | 5.02E-08          |
| 313     | 2.15E-08           | 4.29E-17           | 1.76E-14           | 2.74E-17           | 9.48E-18           | 2.15E-08          |
| 328     | 9.94E-09           | 6.13E-17           | 1.93E-14           | 3.55E-17           | 1.23E-17           | 9.94E-09          |
| 331     | 8.56E-09           | 6.56E-17           | 1.96E-14           | 3.73E-17           | 1.29E-17           | 8.56E-09          |
| 333     | 7.80E-09           | 6.86E-17           | 1.99E-14           | 3.85E-17           | 1.33E-17           | 7.80E-09          |
| 348     | 3.96E-09           | 9.46E-17           | 2.17E-14           | 4.87E-17           | 1.68E-17           | 3.96E-09          |
| 353     | 3.19E-09           | 1.05E-16           | 2.23E-14           | 5.24E-17           | 1.81E-17           | 3.19E-09          |
| 363     | 2.12E-09           | 1.28E-16           | 2.36E-14           | 6.04E-17           | 2.09E-17           | 2.12E-09          |
| 368     | 1.75E-09           | 1.40E-16           | 2.43E-14           | 6.47E-17           | 2.24E-17           | 1.75E-09          |
| 375     | 1.34E-09           | 1.60E-16           | 2.52E-14           | 7.09E-17           | 2.46E-17           | 1.34E-09          |
| 400     | 5.64E-10           | 2.46E-16           | 2.87E-14           | 9.67E-17           | 3.35E-17           | 5.64E-10          |
| 430     | 2.28E-10           | 3.89E-16           | 3.32E-14           | 1.35E-16           | 4.65E-17           | 2.28E-10          |

**Table S14.** Calculated individual and total rate constants for reactions of C<sub>6</sub>F<sub>5</sub>OH with ·OH radical catalyzed by (TiO<sub>2</sub>)<sub>8</sub> cluster within 200–430 K.

| $T$ (K) | $k_{A1-(TiO_2)_8}$ | $k_{A2-(TiO_2)_8}$ | $k_{A3-(TiO_2)_8}$ | $k_{A4-(TiO_2)_8}$ | $k_{A5-(TiO_2)_8}$ | $k_{A-(TiO_2)_8}$ |
|---------|--------------------|--------------------|--------------------|--------------------|--------------------|-------------------|
| 200     | 7.24E-04           | 6.01E-19           | 4.34E-15           | 5.79E-18           | 1.18E-17           | 7.24E-04          |
| 220     | 6.89E-05           | 2.03E-18           | 6.22E-15           | 1.04E-17           | 1.99E-17           | 6.89E-05          |
| 240     | 9.86E-06           | 5.68E-18           | 8.54E-15           | 1.70E-17           | 3.12E-17           | 9.86E-06          |
| 250     | 4.19E-06           | 8.98E-18           | 9.87E-15           | 2.12E-17           | 3.82E-17           | 4.19E-06          |
| 253     | 3.28E-06           | 1.02E-17           | 1.03E-14           | 2.26E-17           | 4.04E-17           | 3.28E-06          |
| 268     | 1.06E-06           | 1.90E-17           | 1.26E-14           | 3.04E-17           | 5.30E-17           | 1.06E-06          |
| 283     | 3.88E-07           | 3.32E-17           | 1.52E-14           | 3.97E-17           | 6.79E-17           | 3.88E-07          |
| 296     | 1.76E-07           | 5.16E-17           | 1.76E-14           | 4.94E-17           | 8.24E-17           | 1.76E-07          |
| 298     | 1.56E-07           | 5.50E-17           | 1.80E-14           | 5.09E-17           | 8.46E-17           | 1.56E-07          |
| 313     | 6.94E-08           | 8.75E-17           | 2.12E-14           | 6.38E-17           | 1.04E-16           | 6.94E-08          |
| 328     | 3.31E-08           | 1.34E-16           | 2.46E-14           | 7.82E-17           | 1.25E-16           | 3.31E-08          |
| 331     | 2.88E-08           | 1.45E-16           | 2.54E-14           | 8.17E-17           | 1.31E-16           | 2.88E-08          |
| 333     | 2.63E-08           | 1.53E-16           | 2.59E-14           | 8.35E-17           | 1.33E-16           | 2.63E-08          |
| 348     | 1.37E-08           | 2.25E-16           | 2.98E-14           | 1.01E-16           | 1.58E-16           | 1.37E-08          |
| 353     | 1.12E-08           | 2.54E-16           | 3.12E-14           | 1.07E-16           | 1.67E-16           | 1.12E-08          |
| 363     | 7.56E-09           | 3.21E-16           | 3.40E-14           | 1.20E-16           | 1.86E-16           | 7.56E-09          |
| 368     | 6.28E-09           | 3.59E-16           | 3.55E-14           | 1.27E-16           | 1.96E-16           | 6.28E-09          |
| 375     | 4.88E-09           | 4.18E-16           | 3.76E-14           | 1.37E-16           | 2.10E-16           | 4.88E-09          |
| 400     | 2.14E-09           | 6.96E-16           | 4.59E-14           | 1.76E-16           | 2.64E-16           | 2.14E-09          |
| 430     | 9.05E-10           | 1.20E-15           | 5.71E-14           | 2.29E-16           | 3.38E-16           | 9.05E-10          |

**Table S15.** Calculated individual and total rate constants for reactions of C<sub>6</sub>F<sub>5</sub>OH with ·OH radical catalyzed by (TiO<sub>2</sub>)<sub>12</sub> cluster within 200–430 K.

| $T$ (K) | $k_{A1-(TiO_2)_{12}}$ | $k_{A2-(TiO_2)_{12}}$ | $k_{A3-(TiO_2)_{12}}$ | $k_{A4-(TiO_2)_{12}}$ | $k_{A5-(TiO_2)_{12}}$ | $k_{A-(TiO_2)_{12}}$ |
|---------|-----------------------|-----------------------|-----------------------|-----------------------|-----------------------|----------------------|
| 200     | 1.44E-04              | 2.02E-16              | 1.23E-15              | 3.81E-18              | 3.14E-18              | 1.44E-04             |
| 220     | 1.36E-05              | 3.82E-16              | 1.84E-15              | 7.41E-18              | 6.19E-18              | 1.36E-05             |
| 240     | 1.90E-06              | 6.63E-16              | 2.60E-15              | 1.30E-17              | 1.11E-17              | 1.90E-06             |
| 250     | 8.01E-07              | 8.50E-16              | 3.05E-15              | 1.67E-17              | 1.42E-17              | 8.01E-07             |
| 253     | 6.27E-07              | 9.13E-16              | 3.19E-15              | 1.80E-17              | 1.54E-17              | 6.27E-07             |
| 268     | 2.01E-07              | 1.28E-15              | 3.97E-15              | 2.52E-17              | 2.17E-17              | 2.01E-07             |
| 283     | 7.26E-08              | 1.74E-15              | 4.86E-15              | 3.43E-17              | 2.97E-17              | 7.26E-08             |
| 296     | 3.27E-08              | 2.22E-15              | 5.71E-15              | 4.36E-17              | 3.80E-17              | 3.27E-08             |
| 298     | 2.91E-08              | 2.30E-15              | 5.86E-15              | 4.50E-17              | 3.95E-17              | 2.91E-08             |
| 313     | 1.28E-08              | 2.99E-15              | 6.97E-15              | 5.84E-17              | 5.12E-17              | 1.28E-08             |
| 328     | 6.07E-09              | 3.81E-15              | 8.22E-15              | 7.38E-17              | 6.47E-17              | 6.07E-09             |
| 331     | 5.27E-09              | 3.99E-15              | 8.48E-15              | 7.71E-17              | 6.81E-17              | 5.27E-09             |
| 333     | 4.82E-09              | 4.11E-15              | 8.65E-15              | 7.94E-17              | 7.01E-17              | 4.82E-09             |
| 348     | 2.48E-09              | 5.12E-15              | 1.01E-14              | 9.79E-17              | 8.67E-17              | 2.48E-09             |
| 353     | 2.03E-09              | 5.50E-15              | 1.06E-14              | 1.05E-16              | 9.33E-17              | 2.03E-09             |
| 363     | 1.37E-09              | 6.29E-15              | 1.16E-14              | 1.19E-16              | 1.06E-16              | 1.37E-09             |
| 368     | 1.13E-09              | 6.72E-15              | 1.22E-14              | 1.27E-16              | 1.13E-16              | 1.13E-09             |
| 375     | 8.81E-10              | 7.35E-15              | 1.29E-14              | 1.38E-16              | 1.23E-16              | 8.81E-10             |
| 400     | 3.81E-10              | 9.92E-15              | 1.60E-14              | 1.83E-16              | 1.64E-16              | 3.81E-10             |
| 430     | 1.60E-10              | 1.37E-14              | 2.02E-14              | 2.46E-16              | 2.23E-16              | 1.60E-10             |

**Table S16.** Calculated individual and total rate constants for reactions of C<sub>6</sub>F<sub>5</sub>OH with ·OH radical catalyzed by (TiO<sub>2</sub>)<sub>16</sub> cluster within 200–430 K.

| $T$ (K) | $k_{A1-(TiO_2)_{16}}$ | $k_{A2-(TiO_2)_{16}}$ | $k_{A3-(TiO_2)_{16}}$ | $k_{A4-(TiO_2)_{16}}$ | $k_{A5-(TiO_2)_{16}}$ | $k_{A-(TiO_2)_{16}}$ |
|---------|-----------------------|-----------------------|-----------------------|-----------------------|-----------------------|----------------------|
| 200     | 1.32E-05              | 2.67E-16              | 8.87E-15              | 3.33E-18              | 1.11E-18              | 1.32E-05             |
| 220     | 1.62E-06              | 5.42E-16              | 1.10E-14              | 6.44E-18              | 2.33E-18              | 1.62E-06             |
| 240     | 2.84E-07              | 9.93E-16              | 1.34E-14              | 1.12E-17              | 4.34E-18              | 2.84E-07             |
| 250     | 1.32E-07              | 1.30E-15              | 1.47E-14              | 1.44E-17              | 5.72E-18              | 1.32E-07             |
| 253     | 1.06E-07              | 1.41E-15              | 1.51E-14              | 1.55E-17              | 6.19E-18              | 1.06E-07             |
| 268     | 3.87E-08              | 2.04E-15              | 1.72E-14              | 2.16E-17              | 8.97E-18              | 3.87E-08             |
| 283     | 1.57E-08              | 2.85E-15              | 1.95E-14              | 2.93E-17              | 1.26E-17              | 1.57E-08             |
| 296     | 7.78E-09              | 3.73E-15              | 2.16E-14              | 3.71E-17              | 1.64E-17              | 7.78E-09             |
| 298     | 7.00E-09              | 3.88E-15              | 2.19E-14              | 3.84E-17              | 1.70E-17              | 7.00E-09             |
| 313     | 3.39E-09              | 5.16E-15              | 2.45E-14              | 4.95E-17              | 2.25E-17              | 3.39E-09             |
| 328     | 1.76E-09              | 6.71E-15              | 2.72E-14              | 6.25E-17              | 2.92E-17              | 1.76E-09             |
| 331     | 1.54E-09              | 7.05E-15              | 2.78E-14              | 6.53E-17              | 3.06E-17              | 1.54E-09             |
| 333     | 1.43E-09              | 7.29E-15              | 2.81E-14              | 6.70E-17              | 3.15E-17              | 1.43E-09             |
| 348     | 7.98E-10              | 9.26E-15              | 3.11E-14              | 8.27E-17              | 3.98E-17              | 7.98E-10             |
| 353     | 6.65E-10              | 9.98E-15              | 3.21E-14              | 8.83E-17              | 4.25E-17              | 6.65E-10             |
| 363     | 4.70E-10              | 1.16E-14              | 3.42E-14              | 1.01E-16              | 4.93E-17              | 4.70E-10             |
| 368     | 3.99E-10              | 1.24E-14              | 3.52E-14              | 1.06E-16              | 5.25E-17              | 3.99E-10             |
| 375     | 3.19E-10              | 1.37E-14              | 3.68E-14              | 1.16E-16              | 5.75E-17              | 3.19E-10             |
| 400     | 1.52E-10              | 1.89E-14              | 4.25E-14              | 1.53E-16              | 7.81E-17              | 1.52E-10             |
| 430     | 7.05E-11              | 2.68E-14              | 5.00E-14              | 2.06E-16              | 1.08E-16              | 7.06E-11             |

**Table S17.** The relative Gibbs free energies ( $\Delta G$ , in kcal/mol) for the reaction complexes, Gibbs free energies barriers ( $G_a$ , in kcal/mol), rate constant ( $k$ , in  $\text{cm}^3 \text{ molecule}^{-1} \text{ s}^{-1}$ ), and branching ratio ( $I$ ) at 298 K involving in the H-abstraction channel of  $\text{C}_6\text{F}_5\text{OH}$  under the absence and presence of  $(\text{TiO}_2)_n$  ( $n = 4, 6, 8, 12,$  and  $16$ ) clusters accompanying with the maximum interatomic distance (MID, in nm) obtained at the M06-2X/6-311++G(3df,3pd)-LANL2DZ level based on the optimized geometries at the levels of M06-2X/6-311G(d,p)-LANL2DZ for  $n=4, 6, 8, 12$  and M06-2X/6-31G(d)-LANL2DZ for  $n=16$ .

| Reactions                        | MID   | $\Delta G$ | $G_a$ | $k$                    | $I$   |
|----------------------------------|-------|------------|-------|------------------------|-------|
| Naked reaction                   |       | 2.68       | 8.78  | $3.84 \times 10^{-18}$ | 0.28% |
| $(\text{TiO}_2)_4$ -catalysis    | 0.532 | -5.78      | 4.95  | $7.55 \times 10^{-8}$  |       |
| $(\text{TiO}_2)_6$ -catalysis    | 0.820 | -5.26      | 4.67  | $5.02 \times 10^{-8}$  |       |
| $(\text{TiO}_2)_8$ -catalysis    | 0.964 | -4.79      | 3.50  | $1.56 \times 10^{-7}$  | 100%  |
| $(\text{TiO}_2)_{12}$ -catalysis | 1.224 | -4.57      | 4.32  | $2.91 \times 10^{-8}$  |       |
| $(\text{TiO}_2)_{16}$ -catalysis | 1.486 | -2.56      | 3.14  | $7.00 \times 10^{-9}$  |       |

**Table S18.** Eoectotoxicity towards aquatic organisms of C<sub>6</sub>X<sub>5</sub>OH (X=F, Cl, and Br) as well as the eoectotoxicity of transformation products of C<sub>6</sub>F<sub>5</sub>OH. (unit: mg/L)

|                                   | Acute toxicity <sup>a</sup> (mg/L)               |                             |                                 | Chronic toxicity (ChV) <sup>b</sup> (mg/L) |          |             | Classification       |
|-----------------------------------|--------------------------------------------------|-----------------------------|---------------------------------|--------------------------------------------|----------|-------------|----------------------|
|                                   | LC <sub>50</sub> >100 or EC <sub>50</sub> >100   |                             |                                 | ChV>10                                     |          |             | Not harmful          |
|                                   | 10< LC <sub>50</sub> (or EC <sub>50</sub> ) <100 |                             |                                 | 1< ChV <10                                 |          |             | Harmful              |
|                                   | 1< LC <sub>50</sub> (or EC <sub>50</sub> ) <10   |                             |                                 | 0.1< ChV <1                                |          |             | Toxic                |
|                                   | LC <sub>50</sub> <1 or EC <sub>50</sub> <1       |                             |                                 | ChV<0.1                                    |          |             | Very toxic           |
| Compound                          | Fish (LC <sub>50</sub> )                         | Daphnid (LC <sub>50</sub> ) | Green Algae (EC <sub>50</sub> ) | Fish                                       | Daphnid  | Green Algae | ECOSAR Class         |
| C <sub>6</sub> F <sub>5</sub> OH  | 12.99                                            | 4.92                        | 21.51                           | 1.41                                       | 0.94     | 10.04       | Phenols              |
| C <sub>6</sub> Cl <sub>5</sub> OH | 0.39                                             | 0.40                        | 1.38                            | 0.06                                       | 0.07     | 0.63        | Phenols              |
| C <sub>6</sub> Br <sub>5</sub> OH | 0.08                                             | 0.15                        | 0.45                            | 0.02                                       | 0.03     | 0.20        | Phenols              |
| IM2A-O-2                          | 4.27                                             | 0.58                        | 44.67                           | 0.12                                       | 0.03     | 6.96        | Vinyl/Allyl Alcohols |
|                                   | 39.56                                            | 25.96                       | 14.19                           | 3.05                                       | 2.49     | 12.45       | Ketone alcohols      |
| IM2A-O-4                          | 74.37                                            | 1638.40                     | 947.08                          | 6.35                                       | 124.58   | 129.33      | Acid Halides         |
|                                   | 7.126                                            | 0.88                        | 249.36                          | 0.50                                       | 0.08     | 27.50       | Vinyl/Allyl Alcohols |
| P-IM2A-O <sub>2</sub>             | 1237.46                                          | 37964.84                    | 19505.76                        | 122.98                                     | 2669.10  | 2307.27     | Acid Halides-acid    |
| P-Cy1-1-a                         | 1962.02                                          | 464000.00                   | 115000.00                       | 497.69                                     | 20128.73 | 5624.16     | Acid Halides         |
| P-Cy1-2-a                         | 145.75                                           | 6112.12                     | 2809.80                         | 16.72                                      | 399.08   | 290.24      | Acid Halides         |
| P-Cy1-2-b-h                       | 402.09                                           | 45186.32                    | 14627.01                        | 72.49                                      | 2336.67  | 985.37      | Acid Halides         |

<sup>a</sup>Criteria set by the European Union (described in Annex VI of Directive 67/548/EEC)

<sup>b</sup>Criteria set by the Chinese hazard evaluation guidelines for new chemical substances (HJ/T 154–2004)
